# Supplementary material for: Enhanced hydrogen production by carbon-doped TiO2decorated with reduced graphene oxide (rGO) under visible light irradiation
Source: Royal Society of Chemistry journal article supplement (doi:10.1039/c5ra26096e), 2015-12-22
Supplement: c5ra26096e1.pdf [file c5ra26096e1.pdf]

## Supporting Information

### **Enhanced Hydrogen Production by Carbon-doped TiO<sub>2</sub> Decorated with Reduced Graphene Oxide (rGO) under Visible Light Irradiation**

Liyuan Kuang, Wen Zhang\*

John A. Reif, Jr. Department of Civil and Environmental Engineering, New Jersey Institute of Technology, Newark, NJ 07102

## S1. Synthesis of GO

3 g graphite powder (Catalog # G67-500, Sigma, USA) was added into 400 mL of 4 °C cold concentrated  $\text{H}_2\text{SO}_4$  containing 18 g of  $\text{KMnO}_4$ . The suspension was mixed by a magnetic stirrer for 4.5 h for the oxidation. The color of the mixture gradually changed from dark purplish green to dark brown. To stop the oxidation process, 20 mL 30%  $\text{H}_2\text{O}_2$  solution was added. GO formed was washed three times with 1-M HCl aqueous solution and with DI water. The washing process was carried out by decanting the supernatant using a centrifugation technique. During the washing process with DI water, GO experience defoliation, which resulted in thickening of the GO solution. The GO gel was subsequently dried in air to obtain the GO powder.

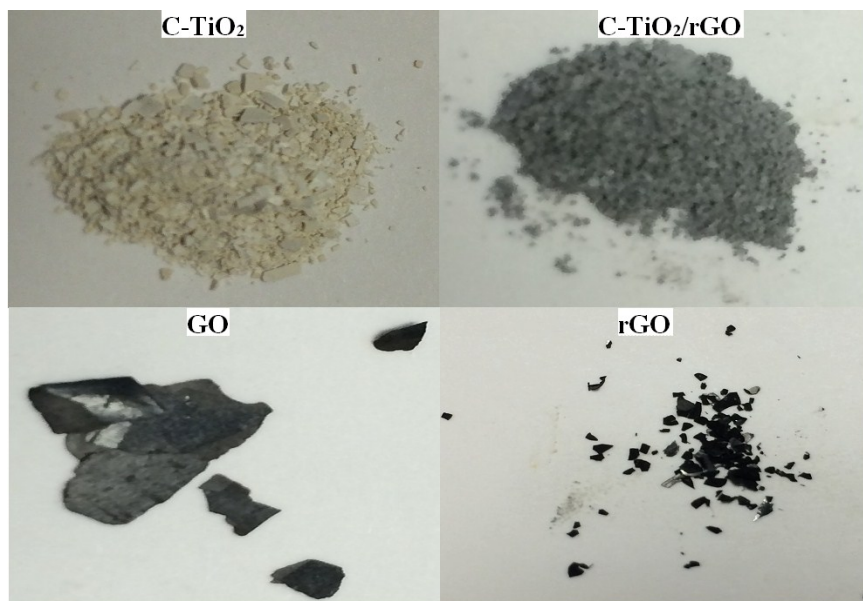

**Figure S1.** Images of C-TiO<sub>2</sub>, C-TiO<sub>2</sub>/rGO, GO and rGO.

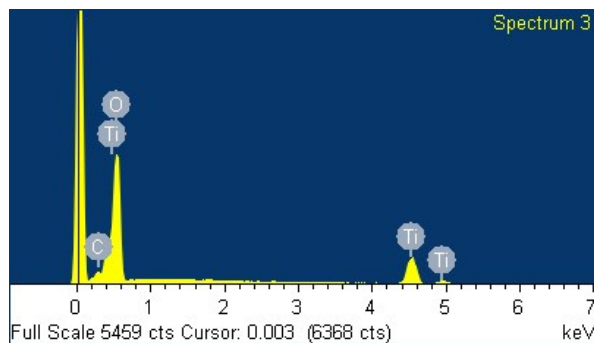

**Figure S2.** EDS of C-TiO<sub>2</sub>.

## S2. Photocatalytic H<sub>2</sub> production using TEOA

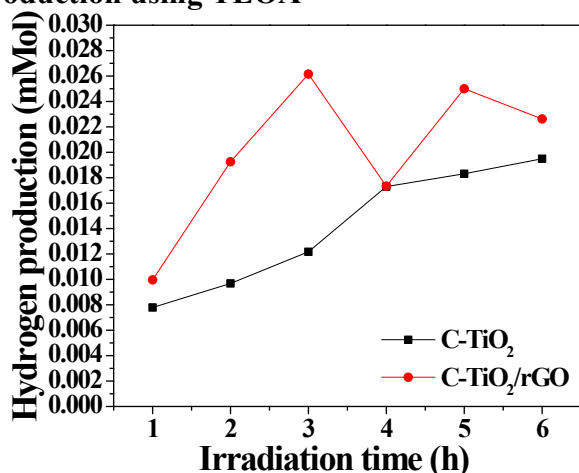

**Figure S3.** Photocatalytic H<sub>2</sub> production kinetics by C-TiO<sub>2</sub> and C-TiO<sub>2</sub>/rGO (0.33 g L<sup>-1</sup>) in the presence of TEOA (15% v/v). The concentration of TEOA was chosen to be at the similar levels as reported previously.<sup>1-4</sup>

## S3. Photocatalytic reaction stoichiometry

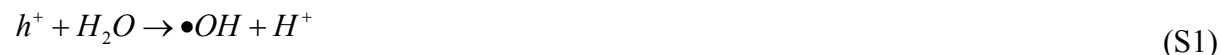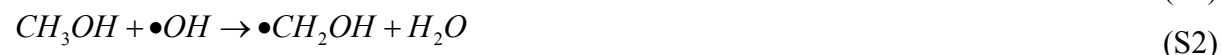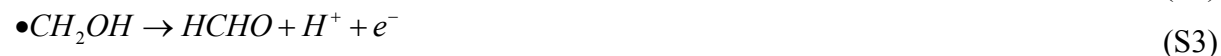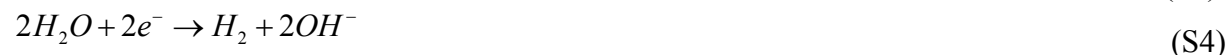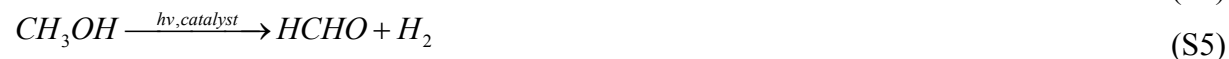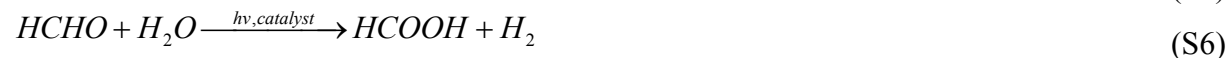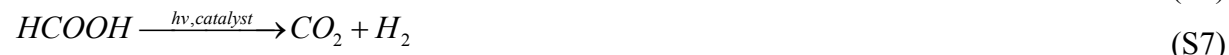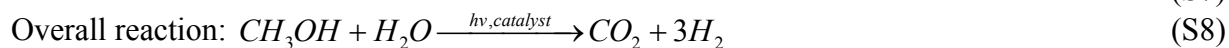

## References

1. Z. Mou, Y. Dong, S. Li, Y. Du, X. Wang, P. Yang and S. Wang, *Int. J. Hydrogen Energy*, 2011, **36**, 8885-8893.
2. S. Min and G. Lu, *Int. J. Hydrogen Energy*, 2013, **38**, 2106-2116.
3. S. Min and G. Lu, *Int. J. Hydrogen Energy*, 2012, **37**, 10564-10574.
4. S. Min and G. Lu, *J. Phys. Chem. C*, 2012, **116**, 25415-25424.
